# Supplementary material for: Rapid and Effective Virucidal Activity of Povidone-Iodine Products Against Middle East Respiratory Syndrome Coronavirus (MERS-CoV) and Modified Vaccinia Virus Ankara (MVA)
Source: Springer Nature journal article supplement (doi:10.1007/s40121-015-0091-9), 2015-09-28
Supplement: MOESM1 [file 9339760]

## *Why carry out this study?*

- Since its first isolation in 2012, Middle East respiratory syndrome coronavirus (MERS-CoV) has infected more than 1300 individuals in 26 countries, and caused more than 480 deaths.
- Following prior demonstration of rapid and effective virucidal activity of povidone iodine (PVP-I) products against another enveloped virus, Ebola, this study tested the *in-vitro* efficacy of three formulations of PVP-I against a surrogate reference virus as well as MERS-CoV itself.

## *What was learned from the study?*

- Virucidal activity was demonstrated by each undiluted PVP-I product versus MVA and MERS-CoV, under both clean and dirty conditions, within 15 seconds of application.
- The findings suggest that PVP-I-based hand wash products and PVP-I gargle/mouthwash may help to support hygiene measures to prevent transmission of MERS-CoV.

This summary slide represents the opinions of the authors. Sponsorship for this study was funded by Mundipharma Research GmbH & Co. Medical writing assistance was provided by Becky Fox-Spencer of Mundipharma Research GmbH & Co. For a full list of acknowledgments and disclosures for all authors of this article, please see the full text online. © The Author(s) 2015. Creative Commons Attribution Noncommercial License (CC BY-NC).
